# Supplementary material for: Synthesis and characterisation of 3-dimensional hydroxyapatite nanostructures using a thermoplastic polyurethane nanofiber sacrificial template
Source: Royal Society of Chemistry journal article supplement (doi:10.1039/c5ra18593a), 2015-01-01

**Supplementary image**

**Supplementary figure 1: Fiber like HAP structure formed using 1cm<sup>2</sup> TPU nanofiber as template**

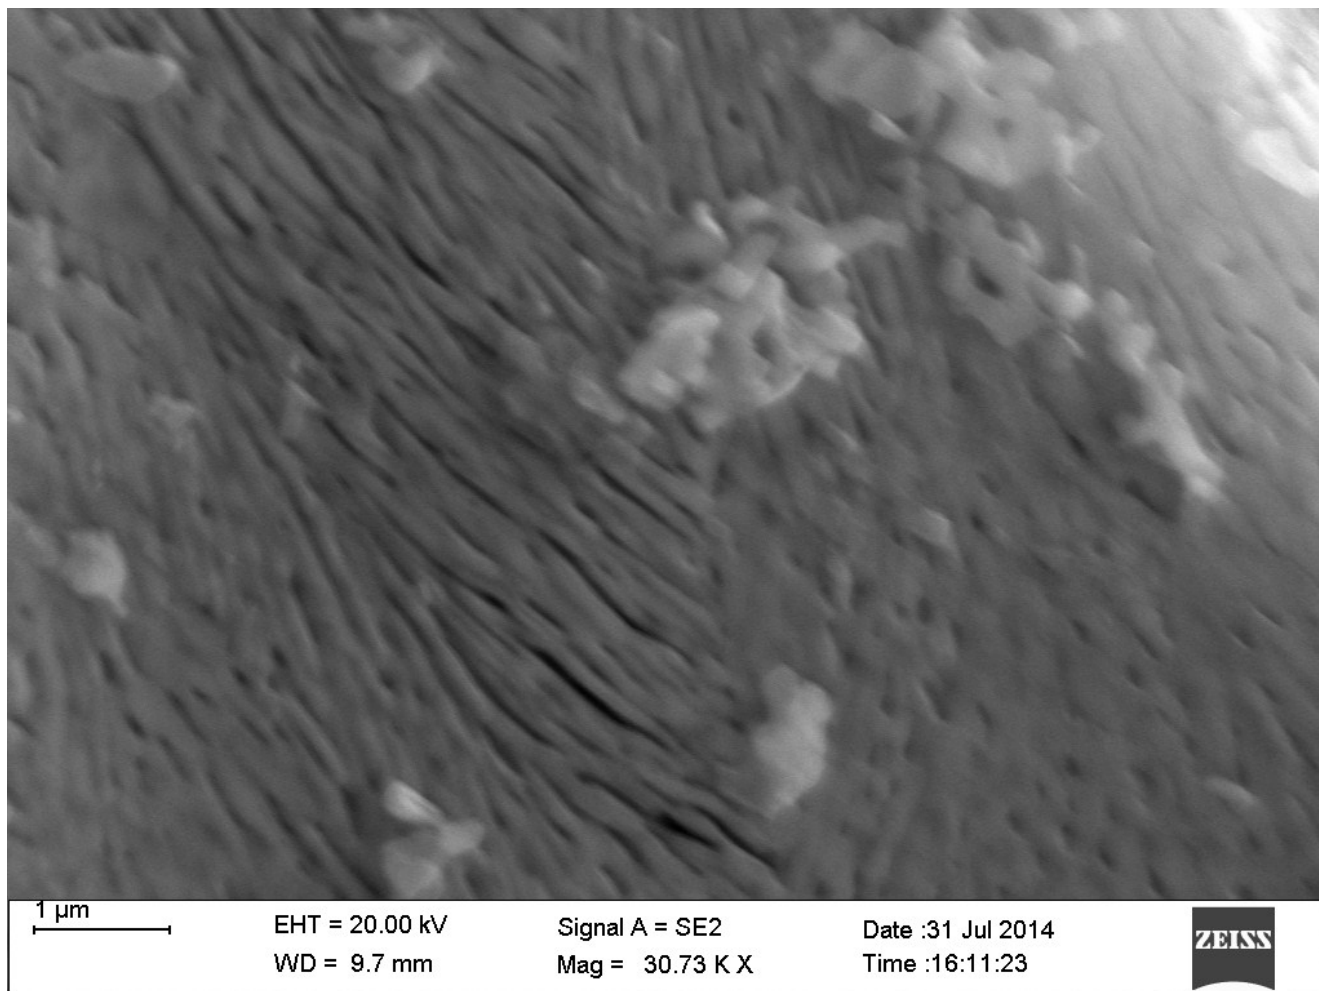

Supplementary figure 2: EDS spectra of (a)C-HAp, (b) 1mm Hap (c) 2.0 cm<sup>2</sup> HAp

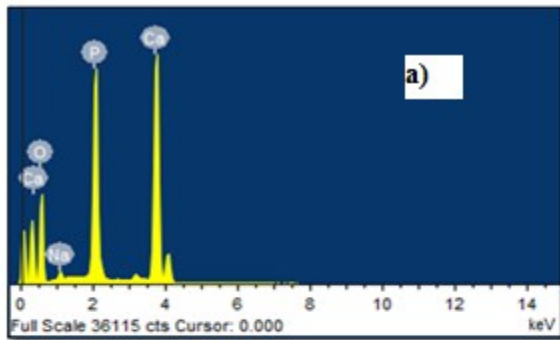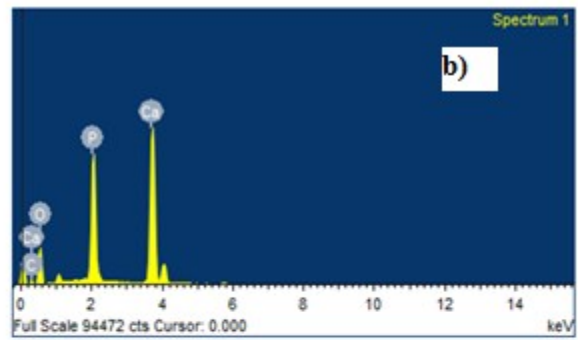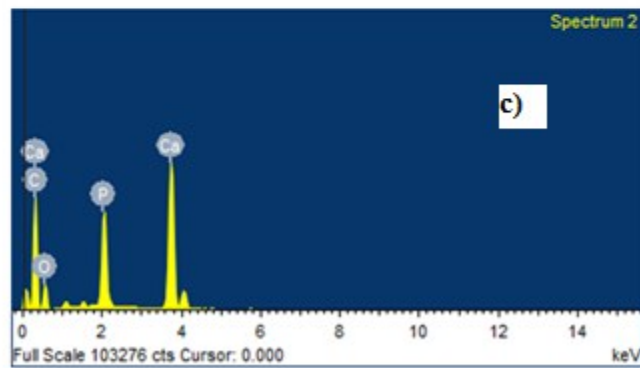

Supplement: c5ra18593a1.pdf [file c5ra18593a1.pdf]
